# Supplementary material
Source: PubMed Central journal article supplement (PMC9527775)
Supplement: hpac091_suppl_supplementary_appendix.pdf [file hpac091_suppl_supplementary_appendix.pdf]

## Supplementary Appendix

**Table S1:** Linear regression models of hypertension control and log-aldosterone level

| Hypertension Control Categories     | Unadjusted Model |                     |         | Adjusted Model <sup>a</sup> |                     |         |
|-------------------------------------|------------------|---------------------|---------|-----------------------------|---------------------|---------|
|                                     | Log-aldosterone  | Confidence Interval | P-trend | Log-aldosterone             | Confidence Interval | P-trend |
| No hypertension                     | 1.34             | 1.32-1.37           | <0.001  | 1.32                        | 1.28-1.36           | <0.001  |
| Controlled hypertension             | 1.61             | 1.57-1.64           |         | 1.65                        | 1.60-1.70           |         |
| Uncontrolled hypertension           | 1.55             | 1.49-1.62           |         | 1.61                        | 1.54-1.68           |         |
| Controlled resistant hypertension   | 1.72             | 1.68-1.77           |         | 1.77                        | 1.72-1.82           |         |
| Uncontrolled resistant hypertension | 1.76             | 1.69-1.84           |         | 1.82                        | 1.74-1.90           |         |

Participants who were not taking antihypertensive medications and had blood pressure  $\geq$  140/90 were included in the no hypertension group.

<sup>a</sup> Model adjusted for age, gender, and risks for OSA.

**Table S2:** Multinomial logistic regression models examining the odds of having specified hypertension as a function of the number of risks for OSA (risk score) where no hypertension and no risks were the referent groups.

|                                       | Unadjusted Model |                     |                      | Adjusted Model <sup>a</sup> |                     |                      |
|---------------------------------------|------------------|---------------------|----------------------|-----------------------------|---------------------|----------------------|
|                                       | Odds Ratio       | Confidence Interval | P-Value <sup>b</sup> | Odds Ratio                  | Confidence Interval | P-Value <sup>b</sup> |
| Controlled hypertension               |                  |                     |                      |                             |                     |                      |
| 1                                     | 1.50             | 1.18-1.90           | 0.001                | 1.53                        | 1.19-1.97           | 0.001                |
| 2                                     | 1.89             | 1.51-2.38           | <.0001               | 2.06                        | 1.61-2.63           | <.0001               |
| 3                                     | 2.00             | 1.57-2.54           | <.0001               | 2.41                        | 1.87-3.12           | <.0001               |
| 4                                     | 1.96             | 1.48-2.58           | <.0001               | 2.66                        | 1.98-3.59           | <.0001               |
| 5                                     | 2.17             | 1.48-3.20           | <.0001               | 3.54                        | 2.36-5.33           | <.0001               |
| 6                                     | 2.03             | 0.98-4.23           | 0.058                | 3.29                        | 1.54-7.05           | 0.002                |
| Uncontrolled hypertension             |                  |                     |                      |                             |                     |                      |
| 1                                     | 1.87             | 1.37-2.54           | <.0001               | 1.89                        | 1.37-2.60           | 0.000                |
| 2                                     | 1.63             | 1.20-2.22           | 0.002                | 1.80                        | 1.30-2.48           | 0.000                |
| 3                                     | 1.87             | 1.36-2.58           | 0.000                | 2.38                        | 1.70-3.34           | <.0001               |
| 4                                     | 2.18             | 1.53-3.12           | <.0001               | 3.23                        | 2.22-4.71           | <.0001               |
| 5                                     | 2.41             | 1.48-3.91           | 0.000                | 4.13                        | 2.48-6.86           | <.0001               |
| 6                                     | 2.92             | 1.27-6.74           | 0.012                | 5.31                        | 2.24-12.62          | 0.000                |
| Resistant hypertension - controlled   |                  |                     |                      |                             |                     |                      |
| 1                                     | 1.71             | 0.93-3.13           | 0.082                | 1.75                        | 0.95-3.23           | 0.074                |
| 2                                     | 1.79             | 0.99-3.25           | 0.054                | 1.97                        | 1.08-3.60           | 0.027                |
| 3                                     | 2.08             | 1.13-3.84           | 0.019                | 2.60                        | 1.40-4.84           | 0.003                |
| 4                                     | 2.28             | 1.16-4.51           | 0.018                | 3.30                        | 1.64-6.61           | 0.001                |
| 5                                     | 2.61             | 1.07-6.35           | 0.035                | 4.55                        | 1.83-11.30          | 0.001                |
| 6                                     | 5.63             | 1.70-18.59          | 0.005                | 9.99                        | 2.94-33.93          | 0.000                |
| Resistant hypertension - uncontrolled |                  |                     |                      |                             |                     |                      |
| 1                                     | 2.15             | 0.92-5.02           | 0.079                | 2.18                        | 0.93-5.14           | 0.075                |
| 2                                     | 3.19             | 1.41-7.19           | 0.005                | 3.53                        | 1.56-8.02           | 0.003                |
| 3                                     | 2.94             | 1.26-6.86           | 0.013                | 3.75                        | 1.59-8.85           | 0.003                |
| 4                                     | 2.10             | 0.77-5.70           | 0.147                | 3.15                        | 1.14-8.67           | 0.026                |
| 5                                     | 3.49             | 1.08-11.28          | 0.037                | 6.27                        | 1.91-20.64          | 0.003                |
| 6                                     | 9.05             | 2.17-37.75          | 0.003                | 17.01                       | 3.96-73.06          | 0.000                |

Participants who were not taking antihypertensive medications and had blood pressure  $\geq$  140/90 were included in the no hypertension group.

<sup>a</sup> Model adjusted for age and gender.

<sup>b</sup> Trend p-value within each hypertension level for risks for OSA <0.001
